# Supplementary material for: Shaping Health: Conducting A Community Health Needs Assessment in Israel's Northern Periphery
Source: Research Square preprint supplement (doi:10.21203/rs.3.rs-1258794/v1), 2022-01-18
Supplement: Supplementary file 1 [file ad74225a5783cca0a0c1d833.docx]

| **Table 1s** adjusted odds ratios from multivariate logistic regression models predicting perceived community strengths among respondents (N = 759), Galilee residents Israel | | | |
| --- | --- | --- | --- |
|  | Community services | Quality of life | Sense of community |
| Ethnicity (Ref: Arabs) | 1.16 | 2.55** | 3.01** |
| Female (Ref: male) | 1.08 | 1.21 | 0.79 |
| Age (ref: 18-29) |  |  |  |
| 30-39 | 5.24 | 0.94 | 1.05 |
| 40-49 | 10.37 | 1.57 | 0.61 |
| 50-64 | 6.76 | 1.82 | 0.54 |
| 65-74 | 7.48 | 0.96 | 1.33 |
| 75+ | 13.29 | 0.96 | 0.30 |
| Education (Ref: high School) |  |  |  |
| Professional school | 0.89 | 0.96 | 2.13* |
| BA | 0.71 | 1.37 | 2.96** |
| MA and above | 0.87 | 1.36 | 4.23** |
| Municipal clusters  (Ref: Eastern Galilee) |  |  |  |
| Western Galilee – Beit  HaKerem | 0.97 | 1.29 | 1.07 |
| Galil Amakim - Kineret  Amakim | 0.79 | 0.90 | 0.64 |
| Locality (Ref: City) | 1.73 | 1.05 | 3.40** |
| Religiosity (Ref: not religious) |  |  |  |
| Not so religious | 0.93 | 0.98 | 0.99 |
| Religious | 0.27** | 0.88 | 1.98 |
| Children number | 0.98 | 0.94 | 1.13 |
| Income | 0.94 | 0.91 | 1.10 |
| **P<0.0012 Bonferroni correction | | | |

| **Table 2s** adjusted odds ratios from multivariate logistic regression models predicting perceived health needs among respondents (N = 759), Galilee residents Israel | | | | | | | | |
| --- | --- | --- | --- | --- | --- | --- | --- | --- |
|  | Health promotion | Hospitals | Community mental health services | Emergency services | Childcare | Elderly services | Community health services | Access to specialists |
| Ethnicity (Ref: Arabs) | 0.43 | 0.50 | 4.56 | 2.62 | 0.95 | 1.56 | 1.02 | 1.04 |
| Female (Ref: male) | 0.78 | 1.53 | 2.18 | 0.48 | 0.97 | 1.64 | 0.83 | 0.95 |
| Age (ref: 18-29) |  |  |  |  |  |  |  |  |
| 30-39 | 1.09 | 2.18 | 1.25 | 1.18 | 2.42 | 0.78 | 1.40 | 0.88 |
| 40-49 | 1.01 | 3.44 | 1.16 | 1.12 | 1.50 | 0.64 | 1.06 | 0.67 |
| 50-64 | 1.33 | 2.22 | 1.90 | 0.83 | 2.51 | 0.79 | 1.28 | 0.71 |
| 65-74 | 1.40 | 2.58 | 2.88 | 1.03 | 1.20 | 0.52 | 0.95 | 0.66 |
| 75+ | 0.76 | 4.95 | - | 3.14 | 4.2 | 0.46 | 1.68 | 1.44 |
| Education (Ref: high School) |  |  |  |  |  |  |  |  |
| Professional  school | 1.22 | 1.18 | 2.32 | 0.39 | 0.93 | 0.59 | 0.78 | 0.74 |
| BA | 1.03 | 1.16 | 3.66 | 0.43 | 1.73 | 1.12 | 1.06 | 0.97 |
| MA and above | 0.89 | 1.18 | 2.92 | 0.43 | 1.49 | 1.28 | 0.99 | 0.75 |
| Municipal clusters  (Ref: Eastern Galilee) |  |  |  |  |  |  |  |  |
| Western Galilee –  Beit HaKerem | 1.99 | 0.81 | 1.34 | 1.05 | 0.86 | 0.68 | 0.98 | 1.20 |
| Galil Amakim –  Kineret Amakim | 1.18 | 0.23 | 1.76 | 1.16 | 1.62 | 1.11 | 1.07 | 1.36 |
| Locality (Ref: City) | 0.92 | 0.89 | 0.95 | 0.49 | 0.78 | 0.86 | 1.32 | 0.78 |
| Religiosity (Ref: not religious) |  |  |  |  |  |  |  |  |
| Not so religious | 0.52 | 1.45 | 1.06 | 1.35 | 0.70 | 0.99 | 1.32 | 1.07 |
| Religious | 0.90 | 1.56 | 2.05 | 1.31 | 0.85 | 0.93 | 1.62 | 1.10 |
| Children number | 0.94 | 0.84 | 0.87 | 0.97 | 0.99 | 1.01 | 1.02 | 1.08 |
| Income | 1.11 | 1.01 | 0.98 | 1.12 | 0.97 | 1.03 | 0.96 | 0.98 |
| **P<0.0012 Bonferroni correction | | | | | | | | |

| **Table 3s** adjusted odds ratios from multivariate logistic regression models predicting perceived health problems among respondents (N = 759), Galilee residents Israel | | | | | | | | | | | | | | |
| --- | --- | --- | --- | --- | --- | --- | --- | --- | --- | --- | --- | --- | --- | --- |
|  | Age-related illness | Cancer | Dental problems | Diabetes | Heart disease and stroke | Infectious diseases | Lung disease (COPD) | Mental Health | Mother and Infant Health | Motor and Vehicle Crash | Obesity | Smoking | Substance Abuse | Violence |
| Ethnicity (Ref: Arabs) | 4.44** | 0.59 | 1.94 | 0.17** | 0.59 | 9.80 | 1.30 | 2.47 | 9.29** | 0.48 | 0.37** | 0.41 | 1.47 | 0.07** |
| Female (Ref: male) | 0.68 | 1.32 | 1.01 | 1.13 | 1.76 | 1.40 | 1.15 | 0.46 | 1.03 | 1.37 | 0.67 | 0.80 | 1.04 | 0.81 |
| Age (ref: 18-29) |  |  |  |  |  |  |  |  |  |  |  |  |  |  |
| 30-39 | 0.64 | 1.13 | 1.52 | 1.43 | 1.24 | 0.89 | 1.06 | 1.09 | 1.05 | 0.36 | 1.42 | 0.70 | 0.45 | 2.24 |
| 40-49 | 0.71 | 1.32 | 1.17 | 3.29 | 1.60 | 1.00 | 1.3 | 0.76 | 0.55 | 0.31 | 1.55 | 0.50 | 0.29 | 0.97 |
| 50-64 | 0.81 | 1.33 | 1.09 | 2.51 | 2.38 | 0.45 | 0.95 | 0.61 | 0.34 | 0.30 | 3.96 | 1.01 | 0.42 | 2.56 |
| 65-74 | 2.95 | 1.82 | 1.31 | 3.55 | 1.96 | 0.23 | 0.73 | 0.44 | 0.26 | 0.04 | 2.23 | 0.49 | 0.68 | 1.80 |
| 75+ | 2.11 | 2.02 | 2.77 | 1.97 | 1.31 | - | 1.76 | 0.22 | 0.06 | - | 2.85 | 0.80 | - | - |
| Education (Ref: high School) |  | 1.46 |  |  |  |  |  |  |  |  |  |  |  |  |
| Professional  school | 1.11 |  | 0.89 | 0.85 | 0.52 | 0.60 | 1.80 | 0.83 | 1.13 | 0.95 | 2.33 | 2.08 | 1.30 | - |
| BA | 1.16 | 1.13 | 0.68 | 0.80 | 0.88 | 2.72 | 1.01 | 0.94 | 1.28 | 0.87 | 1.40 | 1.34 | 0.76 | 1.61 |
| MA and above | 1.25 | 1.10 | 1.0 | 0.71 | 0.64 | 2.85 | 1.09 | 1.11 | 0.91 | 0.98 | 1.36 | 1.28 | 1.06 | 2.79 |
| Municipal clusters  (Ref: Eastern Galilee) |  |  |  |  |  |  |  |  |  |  |  |  |  |  |
| Western Galilee –  Beit HaKerem | 0.99 | 0.88 | 0.66 | 1.25 | 0.43** | 0.44 | 1.40 | 1.36 | 0.73 | 2.44 | 1.33 | 0.77 | 6.07** | - |
| Galil Amakim –  Kineret Amakim | 1.09 | 072 | 0.89 | 0.52 | 0.69 | 0.52 | 0.33 | 1.50 | 0.93 | 1.66 | 1.71 | 2.06 | 5.09* | 4.24 |
| Locality (Ref: City) | 1.24 | 1.38 | 0.82 | 0.85 | 0.58 | 3.14 | 0.89 | 0.54 | 2.05 | 1.15 | 0.57 | 0.58 | 0.49 | 0.69 |
| Religiosity (Ref: not religious) |  |  |  |  |  |  |  |  |  |  |  |  |  |  |
| Not so religious | 0.93 | 1.08 | 1.12 | 0.86 | 0.92 | 0.64 | 2.62 | 0.54 | 0.82 | 1.43 | 1.03 | 0.43 | 2.53 | 1.5 |
| Religious | 0.90 | 0.66 | 1.14 | 1.03 | 1.03 | 1.49 | 1.32 | 0.42 | 1.16 | 0.92 | 1.17 | 1.11 | 3.32* | 0.59 |
| Children number | 0.94 | 0.98 | 1.05 | 0.99 | 0.93 | 1.16 | 0.87 | 1.10 | 1.15 | 1.08 | 1.13 | 0.72 | 0.89 | 0.73 |
| Income | 1.05 | 1.05 | 0.87 | 1.04 | 1.01 | 0.89 | 1.01 | 0.87 | 1.06 | 0.95 | 0.98 | 1.04 | 1.05 | 1.06 |
| Sexual Transmitted Infections was excluded because of low responses. **P<0.0012 Bonferroni correction | | | | | | | | | | | | | | |

| **Table 4s** adjusted odds ratios from multivariate logistic regression models predicting social and structural determinants of health among respondents (N = 759), Galilee residents Israel | | | | | | | | | | |
| --- | --- | --- | --- | --- | --- | --- | --- | --- | --- | --- |
|  | Residence near a polluting factory | Ethnicity discrimination | Pollution | Access to mental health services | Domestic violence | Access to transportation | Poverty | Affordable housing | Child abuse | Affordable childcare |
| Ethnicity (Ref: Arabs) | 0.59 | 0.07** | 0.74 | 5.95** | 0.05** | 23.5** | 0.77 | 0.25 | 0.04** | 0.31** |
| Female (Ref: male) | 0.98 | 3.94 | 0.86 | 0.68 | 0.68 | 1.04 | 2.69 | 1.33 | 4.16 | 0.95 |
| Age (ref: 18-29) |  |  |  |  |  |  |  |  |  |  |
| 30-39 | 1.60 | 0.08 | 1.14 | 0.74 | 0.84 | 0.62 | 1.43 | 1.09 | -- | 1.11 |
| 40-49 | 2.12 | 0.30 | 0.51 | 0.91 | 0.20 | 0.79 | 1.02 | 0.77 | 0.25 | 0.94 |
| 50-64 | 2.01 | 0.18 | 0.49 | 0.59 | 1.27 | 0.77 | 1.06 | 0.45 | 0.84 | 0.73 |
| 65-74 | 3.24 | 0.11 | 0.97 | 0.55 | 4.55 | 0.90 | -- | 1.01 | 0.71 | 1.14 |
| 75+ | -- | -- | -- | 0.16 | -- | 0.78 | -- | 3.66 | -- | 0.91 |
| Education (Ref: high School) |  |  |  |  |  |  |  |  |  |  |
| Professional  school | -- | -- | 2.48 | 0.56 | -- | 0.83 | 1.03 | 0.43 | 0.82 | 0.83 |
| BA | -- | -- | 1.42 | 1.01 | 0.77 | 0.95 | 1.95 | 0.49 | 1.40 | 0.70 |
| MA and above | -- | -- | 1.83 | 1.03 | 0.09 | 1.87 | 1.63 | 0.33 | 0.47 | 0.48 |
| Municipal clusters  (Ref: Eastern Galilee) |  |  |  |  |  |  |  |  |  |  |
| Western Galilee –  Beit HaKerem | 9.5** | -- | 3.47 | 0.61 | 0.70 | 1.29 | 0.64 | 3.08 | 0.38 | 1.32 |
| Galil Amakim –  Kineret Amakim | 2.6 | 0.24 | 3.72 | 0.67 | 0.95 | 0.78 | 0.58 | 1.29 | 0.38 | 1.16 |
| Locality (Ref: City) | 0.57 | 1.69 | 1.84 | 1.56 | 0.51 | 4.07** | 0.21 | 0.68 | 0.79 | 1.01 |
| Religiosity (Ref: not religious) |  |  |  |  |  |  |  |  |  |  |
| Not so religious | 2.32 | 1.27 | 1.22 | 1.14 | 1.22 | 0.98 | 1.71 | 0.80 | 0.23 | 0.71 |
| Religious | 0.63 | 2.25 | 0.58 | 1.11 | 2.53 | 0.73 | 1.81 | 1.57 | 0.36 | 0.74 |
| Children number | 0.89 | 0.84 | 1.05 | 1.10 | 0.86 | 0.91 | 0.92 | 1.13 | 0.79 | 1.28 |
| Income | 1.20 | 0.95 | 0.83 | 1.08 | 1.15 | 1.02 | 0.78 | 1.11 | 0.88 | 1.09 |
| **P<0.0012 Bonferroni correction | | | | | | | | | | |

| **Table 4.1s** adjusted odds ratios from multivariate logistic regression models predicting social and structural determinants of health among respondents (N = 759), Galilee residents Israel | | | | | | | | |
| --- | --- | --- | --- | --- | --- | --- | --- | --- |
|  | Affordable childcare | Parks and recreation | Neighborhood violence | Limited places to exercise | Lack of job opportunities | School dropout | Limited access to healthy food | Access to a doctor's office |
| Ethnicity (Ref: Arabs) | 0.31** | 0.10** | 0.19** | 0.32** | 5.68** | 0.14** | 0.24** | 24.6** |
| Female (Ref: male) | 0.95 | 0.53* | 1.08 | 0.83 | 1.34 | 0.46 | 0.77 | 1.56 |
| Age (ref: 18-29) |  |  |  |  |  |  |  |  |
| 30-39 | 1.11 | 1.58 | 0.29 | 2.53 | 1.29 | 0.57 | 1.94 | 0.73 |
| 40-49 | 0.94 | 1.31 | 0.36 | 2.9 | 0.79 | 0.91 | 1.45 | 0.91 |
| 50-64 | 0.73 | 0.67 | 0.25 | 3.23 | 1.06 | 0.48 | 3.19 | 0.67 |
| 65-74 | 1.14 | 1.43 | 0.15 | 2.71 | 0.86 | 0.64 | 2.55 | 0.42 |
| 75+ | 0.91 | -- | -- | 3.09 | 0.40 | -- | -- | 0.42 |
| Education (Ref: high School) |  |  |  |  |  |  |  |  |
| Professional  school | 0.83 | 0.82 | 4.31 | 0.72 | 1.32 | 1.79 | 1.12 | 0.68 |
| BA | 0.70 | 0.74 | 1.67 | 1.09 | 0.96 | 0.86 | 0.72 | 0.95 |
| MA and above | 0.48 | 0.71 | 2.48 | 1.12 | 1.06 | 0.63 | 0.30 | 1.05 |
| Municipal clusters  (Ref: Eastern Galilee) |  |  |  |  |  |  |  |  |
| Western Galilee –  Beit HaKerem | 1.32 | 0.61 | 4.288 | 0.55 | 0.59 | 2.32 | 1.54 | 0.52 |
| Galil Amakim –  Kineret Amakim | 1.16 | 1.25 | 24.9** | 0.65 | 0.58 | 0.96 | 0.76 | 0.54 |
| Locality (Ref: City) | 1.01 | 0.36** | 0.23** | 1.29 | 0.55 | 0.29 | 0.42 | 2.20** |
| Religiosity (Ref: not religious) |  |  |  |  |  |  |  |  |
| Not so religious | 0.71 | 0.60 | 0.68 | 1.08 | 0.83 | 1.16 | 0.61 | 1.30 |
| Religious | 0.74 | 1.21 | 1.44 | 1.80 | 0.58 | 0.70 | 1.02 | 1.03 |
| Children number | 1.28 | 1.07 | 1.06 | 0.94 | 0.92 | 1.13 | 1.02 | 1.04 |
| Income | 1.09 | 1.03 | 0.77 | 1.01 | 0.89 | 0.96 | 0.92 | 1.11 |
| **P<0.0012 Bonferroni correction | | | | | | | | |
